# Supplementary material
Source: publisher figshare collection journal article supplement (https://acs.figshare.com/ndownloader/files/3753013)
Supplement: Supplementary file 1 [file 3753013]

## **Supporting Information**

Visible-light-induced Activity Control of Peroxidase Bound to Fe-doped Titanate  
Nanosheets with Nanometric Lateral Dimensions

Kai Kamada, Daiki Ito, and Nobuaki Soh

Table of contents

Figure 1S: Mean particle size of xFT.

Figure 2S: Enzyme-mimetic activity of myoglobin bound to 10FT under visible light  
irradiation.

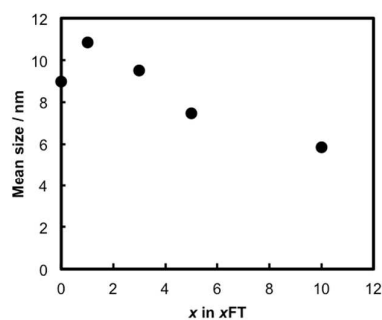

**Figure 1S:** Variation in mean size of xFT as a function of  $x$ . The  $x$  indicates molar concentration of Fe against a total metal amount (Fe + Ti) in Fe-doped titanate nanosheet.

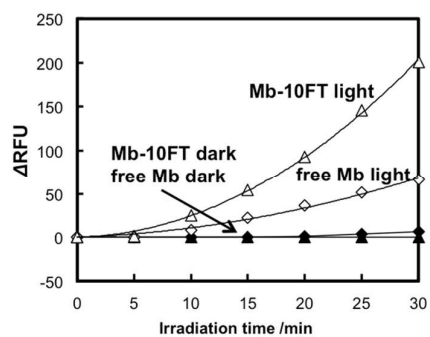

**Figure 2S:** Photoenzymatic oxidation of 25  $\mu\text{M}$  AUR using free Mb and Mb-10FT ( $w_{\text{Mb}} = 0.045 \text{ mg/mL}$ ,  $[\text{total metal}] = 0.38 \text{ mM}$ ) under irradiation of blue light ( $\lambda = 430 \text{ nm}$ ). The solid lines mean the results of non-linear regression for eq. 1 in the manuscript.
